# Supplementary material
Source: publisher figshare collection journal article supplement (https://karger.figshare.com/ndownloader/files/24989567)
Supplement: Supplementary file 1 [file 24989567]

**Table S2. Predictors of eGFR change**

| Variable | Univariable | |  | Multivariable | |
| --- | --- | --- | --- | --- | --- |
| r | P value |  | β | P value |
| Age (years) | −0.04 | 0.58 |  |  |  |
| Men | −0.18 | 0.90 |  |  |  |
| Body mass index (kg/m2) | 0.04 | 0.50 |  |  |  |
| Hypertension | −0.09 | 0.18 |  |  |  |
| Dyslipidemia | 0.04 | 0.59 |  |  |  |
| Diabetes mellitus | −0.16 | 0.02 |  | −0.13 | 0.05 |
| Current smoker | −0.07 | 0.29 |  |  |  |
| Amount of administered contrast (mL) | −0.08 | 0.24 |  |  |  |
| ACE-I or ARB | −0.01 | 0.87 |  |  |  |
| Calcium channel blocker | −0.04 | 0.52 |  |  |  |
| Diuretics | −0.16 | 0.01 |  | −0.19 | 0.004 |
| Baseline eGFR (mL/min/1.73 m2) | −0.03 | 0.27 |  | −0.15 | 0.02 |
| Mean systolic BP (mm Hg) | −0.22 | <0.001 |  | −0.22 | <0.001 |
| CV of systolic BP | −0.13 | 0.03 |  | −0.14 | 0.03 |

Baseline eGFR was included into multivariable model irrespective of a p value on univariable analysis.

ACE-I, angiotensin converting enzyme inhibitor; ARB, angiotensin receptor blocker; BP, blood pressure; CV, coefficient of variation; eGFR estimated glomerular filtration rate.
